# Supplementary material for: Exploring the Potential Effects and Mechanisms of Asarum sieboldii Radix Essential Oil for Treatment of Asthma
Source: MDPI journal article supplement (doi:10.3390/pharmaceutics14030558), 2022-03-03
Supplement: s1 [file s1]

# Supplementary Materials: Exploring the Potential Effects and Mechanisms of *Asarum sieboldii* Radix Essential Oil for Treatment of Asthma

Jae Min Han, Mi Hye Kim, La Yoon Choi, Gyeongsang Kim, Woong Mo Yang

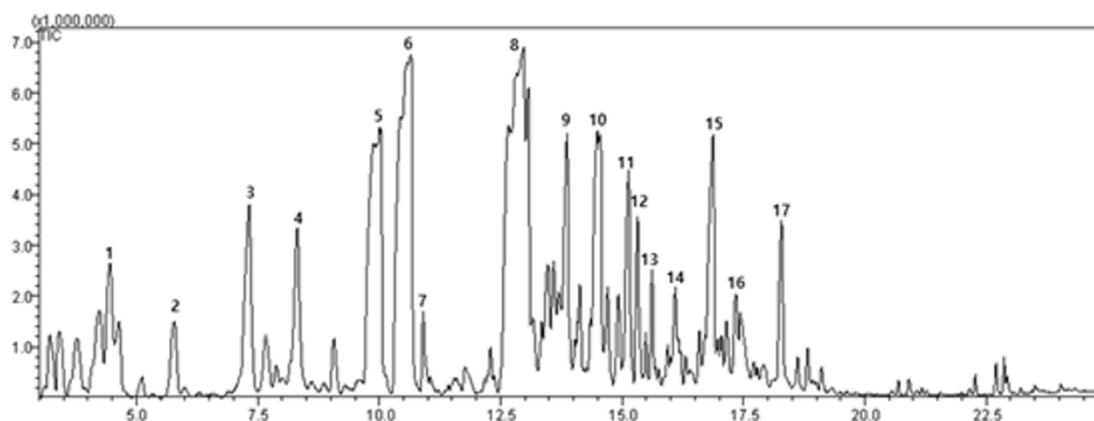

**Figure S1.** Identification of AEO using a GC-MS.

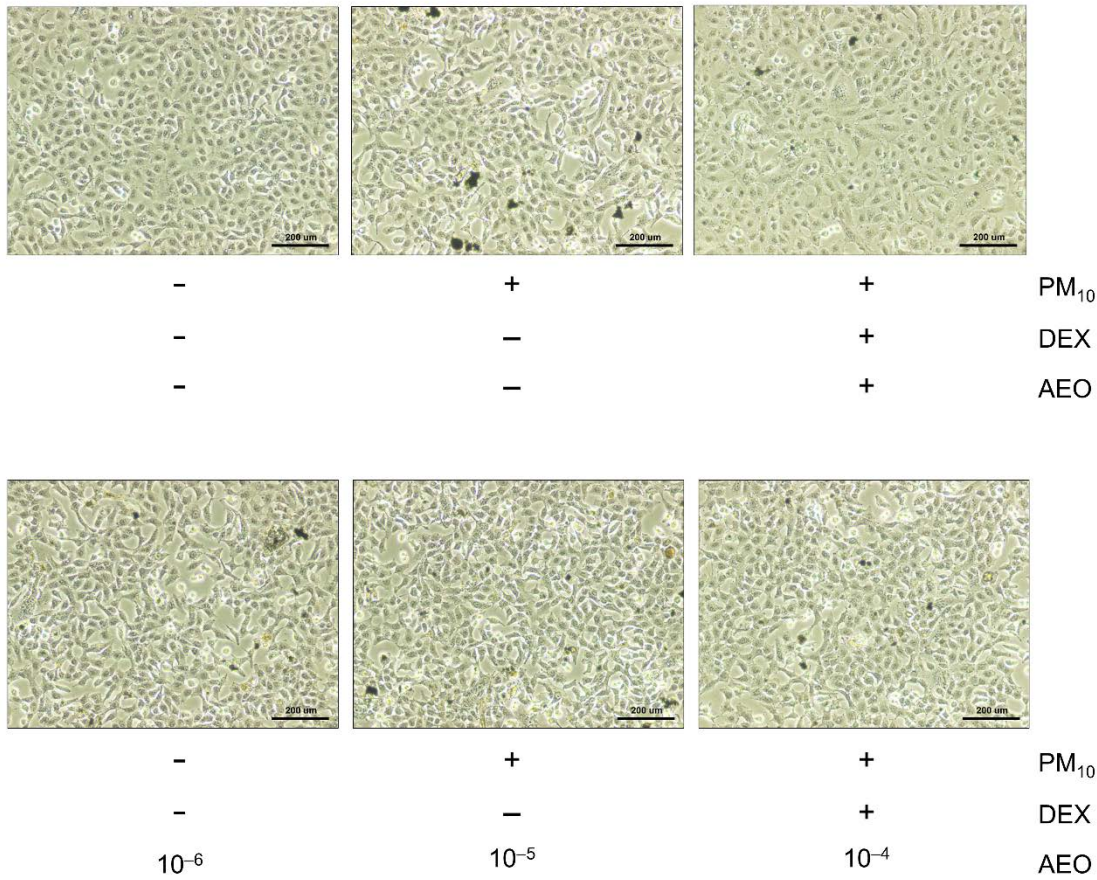

**Figure S2.** Morphological changes in cell structure and shape by incubation of PM<sub>10</sub> and AEO.

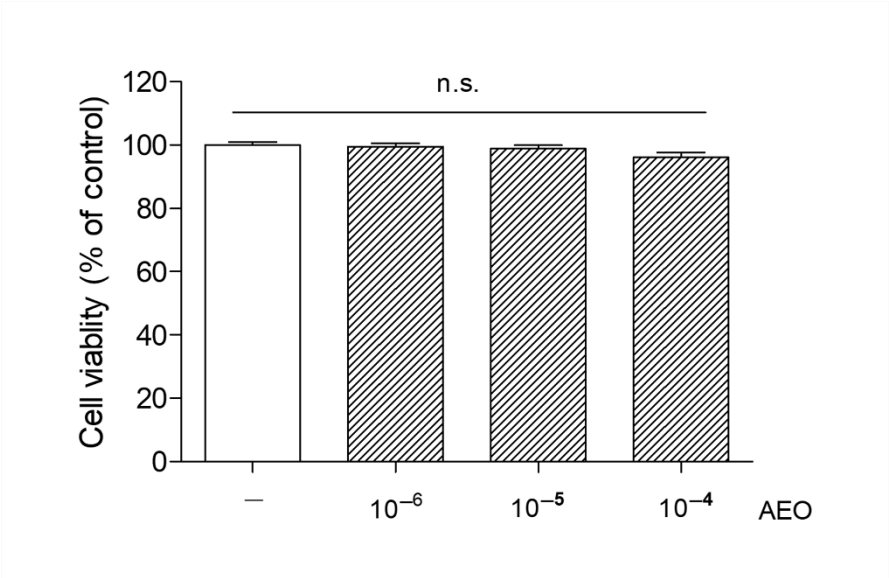

**Figure S3.** Cell viability of A549 cells by treating AEO at the concentrations of 10<sup>-6</sup>, 10<sup>-5</sup> and 10<sup>-4</sup> v/v(%).
